# 1 **riboviz**: analysis and visualization of ribosome profiling datasets

2 Oana Carja <sup>\*1</sup>, Tongji Xing<sup>2</sup>, Joshua B. Plotkin<sup>1</sup>, and Premal Shah <sup>†2,3</sup>

3 <sup>1</sup>Department of Biology, University of Pennsylvania, Philadelphia, 19104

4 <sup>2</sup>Department of Genetics, Rutgers University, Piscataway, NJ, USA

5 <sup>3</sup>Human Genetics Institute of New Jersey, Piscataway, NJ, USA

## 6 **Abstract**

7 Using high-throughput sequencing to monitor translation in vivo, ribosome profiling can provide critical  
8 insights into the dynamics and regulation of protein synthesis in a cell. Since its introduction in 2009,  
9 this technique has played a key role in driving biological discovery, and yet it requires a rigorous computa-  
10 tional toolkit for widespread adoption. We developed a processing pipeline and browser-based visualization,  
11 **riboviz**, that allows convenient exploration and analysis of riboseq datasets. In implementation, **riboviz**  
12 consists of a comprehensive and flexible backend analysis pipeline that allows the user to analyze their private  
13 unpublished dataset, along with a web application for comparison with previously published public datasets.

14 **Availability and implementation:** JavaScript and R source code and extra documentation are freely  
15 available from <https://github.com/shahpr/RiboViz>, while the web-application is live at [www.riboviz.org](http://www.riboviz.org).

## 17 **Introduction**

18 Analyses of mRNA abundances have been used to gain insight into almost every area of modern biology  
19 (1). But ultimately, it is protein synthesis that is the central purpose of mRNAs in a cell. Although mRNA  
20 abundance has been used as a proxy for protein production, the correlation between mRNA and protein levels  
21 is weak, likely due to post-transcriptional regulation (2; 3; 4). Ribosome profiling (**riboseq**) now provides a  
22 direct method to quantify translation, the next obvious step following quantification of transcript abundances  
23 (5; 6). This technique rests on the fact that a ribosome translating a fragment of mRNA protects around 30

---

\*Corresponding author: [ocarja@sas.upenn.edu](mailto:ocarja@sas.upenn.edu)

†Corresponding author: [premal.shah@rutgers.edu](mailto:premal.shah@rutgers.edu)

24 nucleotides of the mRNA from nuclease activity. High-throughput sequencing of these ribosome protected  
25 fragments (called ribosome footprints) offers a precise record of the number and location of the ribosomes  
26 at the time at which translation is stopped. Mapping the position of the ribosome-protected fragments  
27 indicates the translated regions within the transcriptome. Ribosomes spend different periods of time at  
28 different positions, leading to variation in the footprint density along mRNA transcripts. These data provide  
29 an estimate of how much protein is being produced from each mRNA (5; 6). Importantly, ribosome profiling  
30 is as precise and detailed as RNA sequencing. Even in a short time since its introduction in 2009, ribosome  
31 profiling has played a key role in driving biological discovery (13; 14; 15; 16; 17; 18; 19; 20; 21; 12; 22).

32 However, ribosome profiling is not without its limitations. In mammalian cells, there can be over 10  
33 million unique footprints. The quantification and processing of these footprints remains a challenge and  
34 requires computational and domain-specific knowledge. Despite the similarity of ribosome profiling to RNA-  
35 seq, for which there is a well established set of bioinformatic tools, ribosome profiling data differs in how it is  
36 distributed across the genome. The map and density of ribosomal footprints across the genome contain much  
37 more additional information than RNA-seq alone, and traditional bioinformatics pipelines are not designed  
38 to handle such data.

39 We developed a bioinformatic toolkit, **riboviz**, for analyzing and visualizing ribosome profiling data, an  
40 important step for this technology to reach a broad audience of practicing biologists. In implementation,  
41 **riboviz** consists of a comprehensive and flexible backend analysis pipeline along with a web application for  
42 visualization.

## 44 **Methods**

45 **Mapping and parsing riboseq datasets.** A major challenge in analyses of ribosome-profiling datasets is  
46 mapping of individual footprints to ribosomal A, P and E site codons. While several ad hoc rules have been  
47 developed to assign reads to particular codons based on the read lengths, these rules are not implemented  
48 consistently across studies and as a result, comparing foot-printing reads on a gene across datasets remains a  
49 challenge. Using a combination of existing tools used for trimming and mapping reads such as *cutadapt* and  
50 *bowtie*, and in-house perl scripts, we have developed a simple set of instructions on mapping reads. We have  
51 used this pipeline to remap both RNA-seq and foot-printing datasets from published yeast studies to allow  
52 comparison of reads mapped to individual genes across different conditions and labs. In addition, researchers  
53 can download individual datasets in a flexible hierarchical data format (HDF5) and gene-specific estimates  
54 in flat *.tsv* files. The code and documentation for this pipeline are hosted on Github, with a public bug

55 tracker and community contribution (<https://github.com/shahpr/RiboViz>).

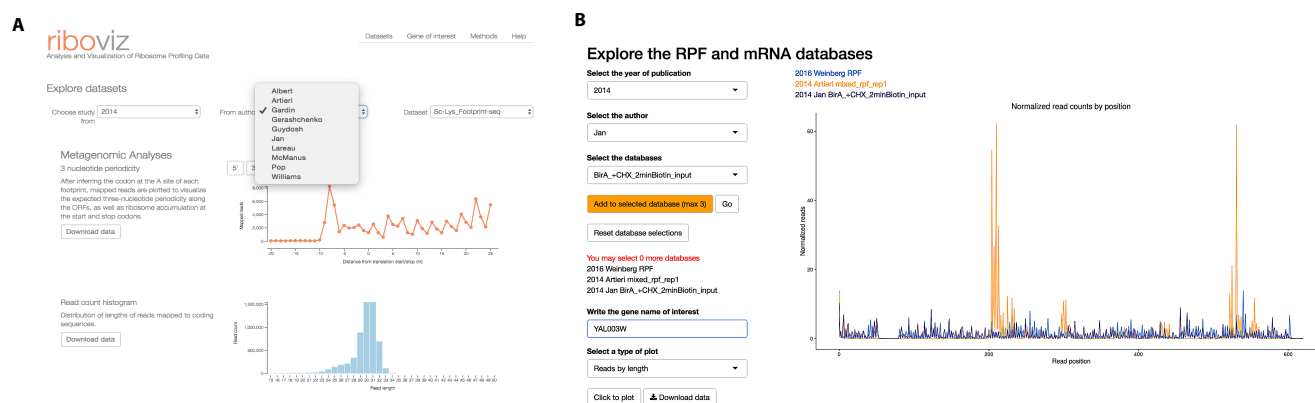

Figure 1: **A.** The **riboviz** website with the user interface allowing dataset selection. **B.** Distribution of reads mapped to YAL003W in three **riboseq** datasets using a Shiny web server.

56

## 57 Web application and visualization toolkit

58 The web application is available at [www.riboviz.org](http://www.riboviz.org). Through this web framework, the user can interactively  
59 explore publicly available ribosome profiling datasets using JavaScript/D3 (31), JQuery (<http://jquery.com>)

60 and Bootstrap (<http://getbootstrap.com>) for metagenomic analyses and R/Shiny for gene-specific analyses.

61 The visualization framework of **riboviz** allows the user to select from available riboseq datasets and visualize  
62 different aspects of the data. Researchers can also download a local version of the Shiny application to analyze

63 their private unpublished dataset alongside other published datasets available through the **riboviz** website.

64 **riboviz** allows visualization of metagenomic analyses of (i) the expected three-nucleotide periodicity in  
65 footprinting data (but not RNA-seq data) along the ORFs as well as ribosome accumulation of ribosomal

66 footprints at the start and stop codons, (ii) the distribution of mapped read lengths to identify changes in

67 frequencies of ribosomal conformations with treatments, (iii) position-specific distribution of mapped reads

68 along the ORF lengths, and (iv) the position-specific nucleotide frequencies of mapped reads to identify

69 potential biases during library preparation and sequencing. **riboviz** also shows the correlation between

70 normalized reads mapped to genes (in reads per kilobase per million RPKM) and their sequence-based

71 features such as their ORF lengths, mRNA folding energies, number of upstream ATG codons, lengths of 5'

72 UTRs, GC content of UTRs and lengths of poly-A tails. Researchers can explore the data interactively and

73 download both the whole-genome and summary datasets used to generate each figure.

74 In addition to the metagenomic analyses, the R/Shiny integration allows researchers to analyze both foot-

75 printing and RNA-seq reads mapped to specific genes of interest, across different datasets and conditions.  
76 The Shiny application allows researchers to visualize reads mapped to a given gene across three datasets to  
77 compare (i) the distribution of reads of specific lengths along the ORF, (ii) the distribution of lengths of  
78 reads mapped to that gene as well as (iii) the overall abundance of that gene relative to its abundance in a  
79 curated set of wild-type datasets.

80

## 81 **Summary**

82 Ribosome profiling has been used in viruses, bacteria, yeast, mice, plants, and human cells. This new tech-  
83 nique requires a rigorous computational toolkit to reach full promise. **riboviz** will increase the accessibility  
84 of this new technology, increase research reproducibility, and offer an broadly useful toolkit for both the  
85 community of systems biologists who study genome-wide ribosome profiling data and also to research groups  
86 focused on individual genes of interest. By developing and distributing this sets of tools we hope to remove  
87 the need for custom script generation by independent researchers, and to increase the pace of genomics  
88 research.

## 89 **Funding**

90 This work has been supported by start-up funds from Human Genetics Institute of New Jersey and Rutgers  
91 University awarded to PS and a Penn Institute for Biomedical Informatics grant to OC. JBP acknowledges  
92 funding from the David & Lucille Packard foundation, Army Research Office, and DARPA.

## 93 **References**

- 94 [1] Wang Z., Gerstein M., and Snyder M. (2009) RNA-Seq: a revolutionary tool for transcriptomics. *Nature Rev. Genet.* 10, 57-63.
- 95 [2] McCann K.L., and Baserga S.J. (2013) Mysterious ribosomopathies. *Science* 341, 849-850.
- 96 [3] Cleary J.D. and Ranum L.P.W. (2013) Repeat-associated non-ATG (RAN) translation in neurological disease. *Hum.Mol.Genet.*  
97 22, R45-R51.
- 98 [4] Bolze A. et al. (2013) Ribosomal protein SA haploinsufficiency in humans with isolated congenital asplenia. *Science* 340, 976-978.
- 99 [5] Ingolia N.T., Ghaemmaghami S., Newman J.R., and Weissman J.S. (2009). Genome-wide analysis in vivo of translation with  
100 nucleotide resolution using ribosome profiling. *Science* 324, 218-223.
- 101 [6] Ingolia N.T. (2014). Ribosome profiling: new views of translation, from single codons to genome scale. *Nat. Rev. Genet.* 15,  
102 205-213.

- 103 [7] Dunn J.G., Foo C.K., Belletier N.G., Gavis E.R., and Weissman J.S. (2013). Ribosome profiling reveals pervasive and regulated  
104 stop codon read-through in *Drosophila melanogaster*. *eLife* 2, e011179.
- 105 [8] Williams C. C., Jan C. H., and Weissman J. S. (2014). Targeting and plasticity of mitochondrial proteins revealed by proximity-  
106 specific ribosome profiling. *Science*, 346(6210), 748-751.
- 107 [9] Guydosh N.R., and Green R. (2014). Dom34 rescues ribosomes in 30 untranslated regions. *Cell* 156, 950-962.
- 108 [10] Zinshteyn B., and Gilbert W.V. (2013). Loss of a conserved tRNA anticodon modification perturbs cellular signaling. *PLoS Genet.*  
109 9, e1003675.
- 110 [11] Pelechano V., Wei W., and Steinmetz L.M. (2015). Widespread Cotranslational RNA Decay Reveals Ribosome Dynamics. *Cell*  
111 161, 1400-1412.
- 112 [12] Gerashchenko M.V., Lobanov A.V. and Gladyshev V.N. (2012). Genome-wide ribosome profiling reveals complex translational  
113 regulation in response to oxidative stress. *Proc. Natl Acad. Sci. USA* 109, 17394 -17399.
- 114 [13] Stern-Ginossar N. et al. (2012) Decoding human cytomegalovirus. *Science* 338, 1088 -1093.
- 115 [14] Bazzini A.A. et al. (2014) Identification of small ORFs in vertebrates using ribosome footprinting and evolutionary conservation.  
116 *EMBO J.* 33, 981 -993.
- 117 [15] Artieri C. G. and Fraser H. B. (2014a). Accounting for biases in riboprofiling data indicates a major role for proline in stalling  
118 translation. *Genome Res*, 24(12), 2011-2021.
- 119 [16] Artieri C. G. and Fraser H. B. (2014b). Evolution at two levels of gene expression in yeast. *Genome Res*, 24(3), 411-421.
- 120 [17] Ingolia N.T., Lareau L.F., and Weissman J.S. (2011). Ribosome profiling of mouse embryonic stem cells reveals the complexity  
121 and dynamics of mammalian proteomes. *Cell* 147, 789-802.
- 122 [18] Li G.W., Burkhardt D., Gross C., and Weissman J.S. (2014). Quantifying absolute protein synthesis rates reveals principles  
123 underlying allocation of cellular resources. *Cell* 157, 624-635.
- 124 [19] McManus C.J., May G.E., Spealman P., and Shteyman A. (2014). Ribosome profiling reveals post-transcriptional buffering of  
125 divergent gene expression in yeast. *Genome Res.* 24, 422-430.
- 126 [20] Pop C., Rouskin S., Ingolia N.T., Han L., Phizicky E.M., Weissman J.S., and Koller D. (2014). Causal signals between codon  
127 bias, mRNA structure, and the efficiency of translation and elongation. *Mol. Syst. Biol.* 10, 770.
- 128 [21] Guttman M., Russell P., Ingolia N.T., Weissman J.S. and Lander E.S. (2013) Ribosome profiling provides evidence that large  
129 noncoding RNAs do not encode proteins. *Cell* 154, 240-251.
- 130 [22] Shalgi R. et al. (2013). Widespread regulation of translation by elongation pausing in heat shock. *Mol. Cell* 49, 439-452.
- 131 [23] Michel A.M. et al. (2012). Observation of dually decoded regions of the human genome using ribosome profiling data. *Genome*  
132 *Res.* 22, 2219-2229.
- 133 [24] Brar G.A. et al. (2012) High-resolution view of the yeast meiotic program revealed by ribosome profiling. *Science* 335, 552-557.
- 134 [25] Shah P., Ding Y., Niemczyk M., Kudla G. and Plotkin J.B. (2013) Rate-limiting steps in yeast protein translation. *Cell* 153,  
135 1589-1601.

- 136 [26] Vogel C. and Marcotte E.M. (2012). Insights into the regulation of protein abundance from proteomic and transcriptomic analyses.  
137 Nature Rev. Genet. 13, 227-232.
- 138 [27] Weinberg D.E., Shah P., Eichhorn S.W., Hussmann J.A., Plotkin J.B., Bartel D.P. (2016) Improved ribosome-footprint and  
139 mRNA measurements provide insights into dynamics and regulation of yeast translation. Cell Reports 14: 1-13.
- 140 [28] Gerashchenko M.V., and Gladyshev V.N. (2014). Translation inhibitors cause abnormalities in ribosome profiling experiments.  
141 Nucleic Acids Res. 42, e134.
- 142 [29] Zheng W., Chung L.M. and Zhao M. (2011) Bias detection and correction in RNA-Sequencing data. BMC Bioinformatics 12, 290.
- 143 [30] Ingolia N.T. (2010) Genome-wide translational profiling by ribosome footprinting. Methods Enzymol. 470, 119-42.
- 144 [31] Bostock M., Ogievetsky V., and Heer J. (2011). D3: Data-Driven Documents. IEEE Trans. Visualization & Comp. Graphics  
145 (Proc. InfoVis).
